# Supplementary material for: Performance, Digestibility, Nitrogen Balance and Ingestive Behavior of Young Feedlot Bulls Supplemented with Palm Kernel Oil
Source: MDPI journal article supplement (doi:10.3390/ani12040429), 2022-02-11
Supplement: s1 [file s1]

Supplementary Table S1. Fatty acid composition of palm kernel oil

| <b>Fatty acid</b>     | <b>Systematic Name</b> | <b>Common Name</b> | <b>g/100g</b> |
|-----------------------|------------------------|--------------------|---------------|
| C4:0 to C10:0         | -                      | -                  | 7.78          |
| C12:0                 | Dodecanoic             | Lauric             | 46.63         |
| C14:0                 | Tetradecanoic          | Myristic           | 16.05         |
| C16:0                 | Hexadecanoic           | Palmitic           | 8.59          |
| C18:0                 | Octadecanoic           | Stearic            | 2.34          |
| C18:1 <sup>cis9</sup> | Octadecaenoic          | Oleic              | 14.06         |
| Others                | -                      | -                  | 4.53          |
| Total                 | -                      | -                  | 100.0         |
